# Supplementary material for: Highly pathogenic avian influenza A(H5N1) virus infection in foxes with PB2-M535I identified as a novel mammalian adaptation, Northern Ireland, July 2023
Source: PubMed Central journal article supplement (PMC10588307; doi:10.2807/1560-7917.es.2023.28.42.2300526), 2023-10-19
Supplement: 23-00526_LEMON_SUPPLEMENT.pdf [file 23-00526_LEMON_SUPPLEMENT.pdf]

## Supplementary Material

This supplementary material is hosted by *Eurosurveillance* as supporting information alongside the article *Highly pathogenic avian influenza A(H5N1) infection in foxes identified PB2-M535I as a novel mammalian adaptation, Northern Ireland, July 2023*, on behalf of the authors, who remain responsible for the accuracy and appropriateness of the content. The same standards for ethics, copyright, attributions and permissions as for the article apply. Supplements are not edited by *Eurosurveillance* and the journal is not responsible for the maintenance of any links or email addresses provided therein

### Supplementary Table S1. Origin of the HPAI sequences used for phylogenetic analysis

| Isolate name                                        | Isolate ID       | Collection date | Submission date | Originating lab                                                                                                         | Submitting lab                                                 |
|-----------------------------------------------------|------------------|-----------------|-----------------|-------------------------------------------------------------------------------------------------------------------------|----------------------------------------------------------------|
| A/Nene_Goose/Northern_Ireland/013322/2022           | EPI_ISL_15586116 | 2022-10-10      | 2022-10-31      | Animal and Plant Health Agency (APHA)                                                                                   | Animal and Plant Health Agency (APHA)                          |
| A/Barnacle_goose/Northern_Ireland/159014/2022       | EPI_ISL_16384152 | 2022-11-17      | 2023-01-04      | Animal and Plant Health Agency (APHA)                                                                                   | Animal and Plant Health Agency (APHA)                          |
| A/Bufflehead_Duck/Northern_Ireland/012321/2022      | EPI_ISL_15586107 | 2022-10-10      | 2022-10-31      | Animal and Plant Health Agency (APHA)                                                                                   | Animal and Plant Health Agency (APHA)                          |
| A/Eurasian_Wigeon/Netherlands/1/2022                | EPI_ISL_15925875 | 2022-10-29      | 2022-11-28      | Erasmus Medical Center                                                                                                  | Erasmus Medical Center                                         |
| A/duck/Saratov/29-02V/2021                          | EPI_ISL_5463797  | 2021-09-30      | 2021-10-25      | Center of Hygiene and Epidemiology in Saratov Oblast                                                                    | State Research Center of Virology and Biotechnology (VECTOR)   |
| A/mute swan/Czech Republic/22380/2021               | EPI_ISL_9603920  | 2021-11-15      | 2022-02-07      | State Veterinary Institute Prague                                                                                       | State Veterinary Institute Prague                              |
| A/chicken/Italy/IZSLT-122448_21VIR9218-1/2021       | EPI_ISL_7733644  | 2021-10-28      | 2021-12-16      | Istituto Zooprofilattico Sperimentale del Lazio e della Toscana "M. Aleandri"                                           | Istituto Zooprofilattico Sperimentale Delle Venezie            |
| A/peregrine_falcon/Ireland/000191_22VIR1325-15/2022 | EPI_ISL_11259265 | 2022-01-05      | 2022-03-22      | Central Veterinary Research Laboratory                                                                                  | Istituto Zooprofilattico Sperimentale delle Venezie            |
| A/pheasant/Finland/13088_21RS3535-6/2021            | EPI_ISL_15518266 | 2021-10-01      | 2022-10-27      | Finnish Food Authority                                                                                                  | Istituto Zooprofilattico Sperimentale Delle Venezie            |
| A/grey heron/Czech Republic/23608/2021              | EPI_ISL_8515481  | 2021-11-28      | 2022-01-09      | State Veterinary Institute Prague                                                                                       | State Veterinary Institute Prague                              |
| A/gull/France/22P015977/2022                        | EPI_ISL_13519451 | 2022-05-11      | 2022-06-29      | ANSES (Ploufragan-Plouzane)                                                                                             | ANSES Agence Nationale De Securite Sanitaire De L'alimentation |
| A/fox/Italy/23VIR3885-1/2023                        | EPI_ISL_17679728 | 2023-04-07      | 2023-05-18      | Istituto Zooprofilattico Sperimentale delle Venezie, EU/OIE/Reference Laboratory and FAO Reference Centre for AI and ND | Istituto Zooprofilattico Sperimentale Delle Venezie            |
| A/arctic-fox/Finland/621/2023                       | EPI_ISL_18122439 | 2023-07-24      | 2023-08-22      | Finnish Food Authority                                                                                                  | Finnish Institute for Health and Welfare, THL                  |
| A/blue fox/Finland/2023AI06820_015/2023             | EPI_ISL_18131276 | 2023-08-03      | 2023-08-24      | University of Helsinki, Department of Virology                                                                          | Friedrich-Loeffler-Institut                                    |
| A/silver fox/Finland/2023AI06834_029/2023           | EPI_ISL_18131279 | 2023-08-04      | 2023-08-24      | University of Helsinki, Department of Virology                                                                          | Friedrich-Loeffler-Institut                                    |

### Supplementary Table S2. Nucleotide variation between fox and gull derived HPAI (A)H5N1 sequences

| Nucleotide differences                             | PB2 |      |      |      |      | PB1 |     |     |     |      |      | PA   |     | HA   | NP |    |     |      |      | NA   | MP  |     |     | NS  |     |     |   |
|----------------------------------------------------|-----|------|------|------|------|-----|-----|-----|-----|------|------|------|-----|------|----|----|-----|------|------|------|-----|-----|-----|-----|-----|-----|---|
|                                                    | 838 | 1431 | 1632 | 2028 | 2067 | 138 | 306 | 584 | 741 | 1113 | 1239 | 1698 | 276 | 2088 | 13 | 21 | 129 | 1249 | 1250 | 1257 | 597 | 136 | 368 | 585 | 781 | 699 |   |
| A/red fox/Northern Ireland/22185/2023 (Fox 1)      | G   | C    | G    | C    | C    | C   | T   | G   | G   | G    | C    | A    | A   | A    | G  | T  | T   | T    | C    | A    | G   | C   | A   | A   | A   | G   | A |
| A/red fox/Northern Ireland/22191/2023 (Fox 2)      | A   | C    | A    | C    | C    | T   | T   | G   | G   | G    | C    | A    | A   | A    | G  | T  | T   | T    | C    | A    | G   | C   | A   | A   | A   | G   | A |
| A/common gull/Northern Ireland/23006/2023 (Gull 2) | A   | C    | G    | C    | T    | C   | T   | A   | G   | G    | C    | G    | A   | G    | G  | C  | T   | T    | C    | A    | G   | C   | A   | A   | A   | G   | A |
| A/common gull/Northern Ireland/23002/2023 (Gull 1) | A   | T    | G    | T    | T    | C   | C   | G   | A   | A    | T    | G    | G   | A    | T  | T  | C   | A    | A    | T    | A   | T   | G   | G   | A   | G   |   |
